# Supplementary material
Source: Springer Nature journal article supplement (https://www.springermedizin.de/resource/supplementary/12936_2008_800_MOESM3_ESM.pdf/9548956)

## Economic Costs

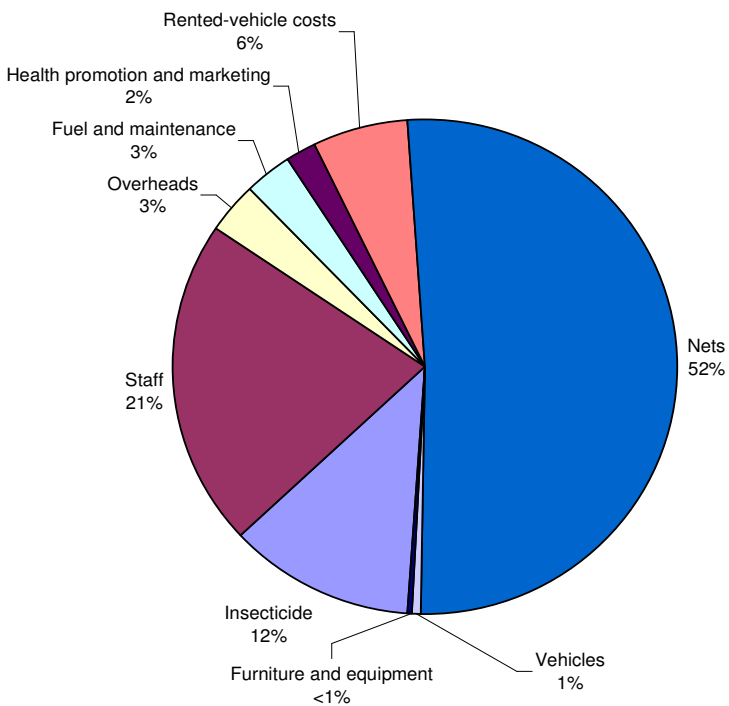

---

## Financial Costs

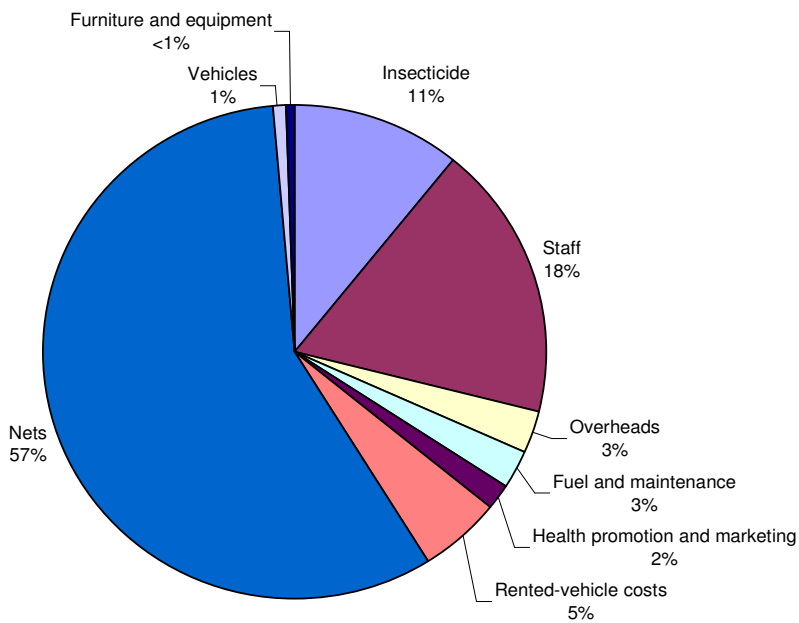

Supplement: MOESM3 [file 9548956]
